# Supplementary material
Source: Springer Nature journal article supplement (https://mijn.bsl.nl/resource/supplementary/13047_2009_96_MOESM2_ESM.pdf/7109684)
Supplement: MOESM2 [file 7109684]

Prospective participants screened for AI and NNHT

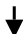

**Clinical measurements**  
AI and NNHT measurements taken from Scott et al [7]  
– based on 50 young adults

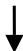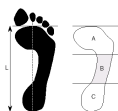

| <b>FLAT-ARCHED FOOT</b> inclusion values for clinical measures (greater than 2 SD)* |        |
|-------------------------------------------------------------------------------------|--------|
| AI                                                                                  | NNHT   |
| > 0.32                                                                              | < 0.17 |

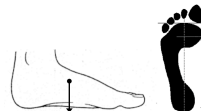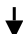

AI and or NNHT exceed values for one foot?

YES

NO

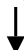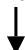

Participant referred for A-P and lateral radiographs

Participant not recruited to study

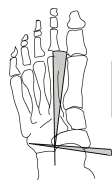

**Radiographic measurements**  
CIA and TSMA greater than 1 SD taken from normal-arched foot study

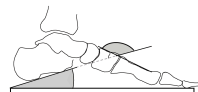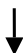

**FLAT-ARCHED FOOT** inclusion values for radiographic measures (greater than 1 SD from mean obtained for normal-arched foot study) (refer to Table 1 for actual flat-arched foot values)

| CIA     |         | C1MA     |          | TNCA    |         | T2MA    |         |
|---------|---------|----------|----------|---------|---------|---------|---------|
| Males   | Females | Males    | Females  | Males   | Females | Males   | Females |
| < 17.9° | < 17.2° | > 136.1° | > 137.4° | > 19.3° | > 21.7° | > 20.5° | > 18.8° |

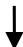

Lateral and / or A-P measurements greater than inclusion values above for at least one foot?

YES

NO

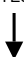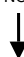

Participant recruited to study – labelled **FLAT-ARCHED FEET** (n=30)  
i.e. 77% successful

Participant not recruited to study – labelled **'NON-QUALIFIERS'** (n=9)  
i.e. 23% unsuccessful
